# Supplementary material
Source: publisher figshare collection journal article supplement (https://gsajournals.figshare.com/ndownloader/files/24962519)
Supplement: Supplementary file 1 [file 24962519]

## Sheet: Sheet1
Table S2. CRISPRa plasmids used in this study
Figure	CRISPRa plasmid		sgRNA sequence
Fig. 2b	0% GC		AAAATAAAATAAAATAAAAT
	30% GC		TATTATAGATAACTGGCTAG
	50% GC		GTCATCAGGAATCTGGCTAG
	70% GC		CTCGCACGGAGGCTGGCTAG
	80% GC		CCCGCACGGAGGCTGGCTCG
	90% GC		CCCGCGCGGAGGCTGGCCCG
Fig. 3b	PAMPNs	2 GC	ATATTTAATTATATCTAGTA
		4 GC	ATATTTAATTATATCTAGCC
		6 GC	ATATTTAATTATATCGCGGC
	PAMDNS	2 GC	CTAGTTAATTATATATAATA
		4 GC	CTAGCCAATTATATATAATA
		6 GC	CGCGCCAATTATATATAATA
Fig. 5a	Group A	sgRNA target T strand	CCTACCGCACGTCGCCTACG
		sgRNA target NT strand	CGTAGGCGACGTGCGGTAGG
	Group B	sgRNA target T strand	CCATATGCACGTCGATATCG
		sgRNA target NT strand	CGATATCGACGTGCATATGG
